# Supplementary material for: Heart Failure Attributable to Hemoglobinopathies and Hemolytic Anemia: A Three-Decade Cross-Sectional Assessment of the Global Burden
Source: Research Square preprint supplement (doi:10.21203/rs.3.rs-4225579/v1), 2024-04-11
Supplement: Supplementary file 1 [file 3f381661cf859c5bd0340796.xlsx]

## Sheet: Sheet1
Table 2. The global prevalence rate and their change trends of heart failure with hemoglobinopathies and hemolytic anemia from 1990 to 2019
Characteristics	1990		2019		1990-2019
	cases(95% UI)	ASR(95% UI)	cases(95% UI)	ASR(95% UI)	EAPC(95%CI)
Global	50803.49 (40774.41-62831.02)	0.95 (0.76-1.17)	84773.58 (69596.88-102852.51)	1.10 (0.90-1.33)	0.49 (0.44-0.54)
Male	25239.58 (19967.34-31461.82)	0.94 (0.74-1.17)	41903.83 (34188.42-50848.77)	1.08 (0.88-1.31)	0.52 (0.47-0.57)
Female	25563.91 (20533.9-31357.93)	0.96 (0.77-1.18)	42869.75 (35158.51-51846.15)	1.11 (0.91-1.34)	0.47 (0.42-0.52)
High SDI	12970.21 (10648.52-15885.05)	1.58 (1.3-1.93)	19349.59 (15978.79-23204.74)	1.91 (1.58-2.29)	0.71 (0.59-0.84)
High-middle SDI	11037.79 (8835.71-13531.64)	0.96 (0.77-1.18)	18423.46 (15113.71-22360.71)	1.29 (1.06-1.56)	0.97 (0.94-1.00)
Middle SDI	15979.39 (12278.14-20366.27)	0.93 (0.72-1.19)	25425.31 (20407.1-31132.23)	1.06 (0.85-1.30)	0.45 (0.40-0.50)
Low-middle SDI	6143.86 (4684.06-8011.49)	0.54 (0.41-0.71)	10790.49 (8552.21-13477.73)	0.61 (0.48-0.76)	0.36 (0.33-0.40)
Low SDI	4649.53 (3421.92-6184.63)	0.88 (0.65-1.17)	10745.36 (7960.04-14154.27)	0.95 (0.71-1.25)	0.28 (0.27-0.3)
African Region	4668.52 (3445.57-6199.71)	0.92 (0.68-1.22)	10447.72 (7736.18-13947.7)	0.95 (0.70-1.27)	0.04 (0.01-0.07)
Eastern Mediterranean Region	4154.69 (2962.94-5686.04)	1.1 (0.78-1.5)	7667.56 (5538.89-10446.29)	1.06 (0.76-1.44)	-0.06 (-0.1--0.03)
European Region	7873.93 (6537.75-9482.18)	0.91 (0.76-1.1)	9858.66 (8235.48-11819)	1.06 (0.88-1.27)	0.33 (0.24-0.41)
Region of the Americas	7712.06 (6215.38-9520.54)	1.08 (0.87-1.33)	12579.6 (10379.6-15115.2)	1.25 (1.03-1.5)	0.73 (0.57-0.90)
South-East Asia Region	7395.07 (5731.51-9436.64)	0.57 (0.44-0.72)	12594.38 (10328.34-15250.12)	0.62 (0.51-0.76)	0.31 (0.24-0.37)
Western Pacific Region	18843.87 (14661.19-23429.49)	1.21 (0.94-1.5)	31330.25 (25327.5-38196.82)	1.62 (1.31-1.98)	1.03 (0.97-1.09)
