# Supplementary material for: Heart Failure Attributable to Hemoglobinopathies and Hemolytic Anemia: A Three-Decade Cross-Sectional Assessment of the Global Burden
Source: Research Square preprint supplement (doi:10.21203/rs.3.rs-4225579/v1), 2024-04-11
Supplement: Supplementary file 2 [file e05d9ca8de857d75a8fe9595.xlsx]

## Sheet: Sheet1
Table 1. The global prevalence rate and their change trends of hemoglobinopathies and hemolytic anemia from 1990 to 2019
Characteristics	1990		2019		1990-2019
	cases(95% UI)	ASR(95% UI)	cases(95% UI)	ASR(95% UI)	EAPC(95%CI)
Global	1349490276 (1295842941-1403726952)	25093.8 (24101.65-26094.56)	2114670544 (2026141880-2205154076)	27443.95 (26296.66-28619.01)	0.26 (0.18-0.35)
Male	461733821.7 (436751091.1-489078934.8)	17051.45 (16133.73-18058.53)	719918193 (678060401.7-765136062.3)	18603.73 (17519.04-19770.18)	0.32 (0.28-0.36)
Female	887756454.3 (859429666.7-915972190.1)	33194.23 (32134.19-34250.48)	1394752351 (1347785471-1440906039)	36393.78 (35167.54-37602.64)	0.24 (0.12-0.35)
High SDI	156646521.3 (150187337.5-163149372.6)	19060.73 (18280.08-19841.56)	169400447.6 (161422400.9-177843314.9)	16841.02 (16043.85-17677.7)	-0.21 (-0.34--0.09)
High-middle SDI	226284712.5 (217663041.5-235469328.1)	19699.16 (18949.8-20501.5)	296955061.4 (285325231.7-309127249.4)	20753.37 (19916.53-21633.46)	0.12 (-0.01-0.25)
Middle SDI	431514272.9 (415029117.2-449638960.1)	25255.81 (24297.98-26313.18)	637934467.2 (615011710.7-663846627.5)	26621.75 (25665.42-27696.79)	0.08 (-0.03-0.20)
Low-middle SDI	356590930 (340725826.5-372179046.5)	31700.08 (30318.01-33068.05)	613537713.7 (586397846.5-639181387.5)	34844.13 (33316.16-36296.23)	0.22 (0.11-0.34)
Low SDI	177721750 (169033292.8-186470526.8)	33738.64 (32093.31-35370.26)	395670668.3 (375028276.4-416523475.4)	35185.21 (33377.46-37006.05)	0.07 (0.00-0.13)
African Region	199266504.1 (189530616.5-208886057.7)	39138.02 (37246.4-41006.72)	425831423.1 (403199927.6-448840462.6)	38620.91 (36590.85-40701.71)	0.01 (-0.01-0.04)
Eastern Mediterranean Region	102007193 (96954402.77-107305601.8)	27081.89 (25763.55-28486.98)	194081883.8 (183140855.5-205460695.5)	26933.83 (25425.44-28494.51)	-0.05 (-0.08--0.02)
European Region	153331616.5 (145814337.8-160885881.3)	17743.72 (16877.31-18621.25)	165157865.6 (155040730.9-175640815.3)	17535.67 (16434.95-18666.53)	-0.02 (-0.07-0.04)
Region of the Americas	152771182.9 (146804995.6-158708307.6)	21448.27 (20622.24-22275.15)	180148601.1 (172809762.8-187886540)	17737 (17006.75-18517.21)	-0.41 (-0.54--0.29)
South-East Asia Region	403395881 (386358336.5-420611005.2)	31034.75 (29745.96-32341.09)	716079864.1 (687344256.1-745321313.1)	35592.16 (34168.83-37041)	0.26 (0.11-0.42)
Western Pacific Region	335430753.6 (318970226.8-356431719)	21424.16 (20384.61-22752.19)	428356175.4 (409586564.7-451116529.4)	22132.33 (21142.95-23316.98)	-0.02 (-0.25-0.21)
Abbreviations: ASR, age-standardized rate; CI, confidence interval; EAPC, estimated annual percentage change; UI, uncertainty interval
